# Supplementary material
Source: Springer Nature journal article supplement (https://www.springermedizin.de/resource/supplementary/12913_2008_837_MOESM2_ESM.pdf/9535690)

(a) Six Most Frequent Primary Diagnoses (% of 334 cases with primary diagnosis coded)

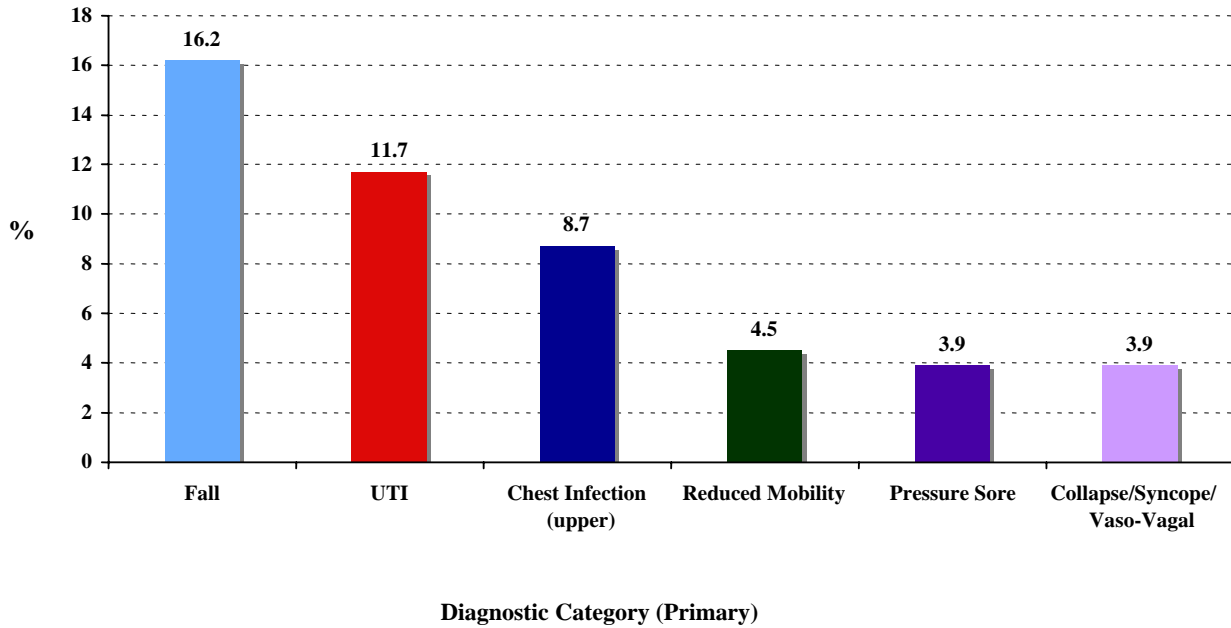

(b) Five Most Frequent Secondary Diagnoses (% of 259 cases with secondary diagnosis coded)

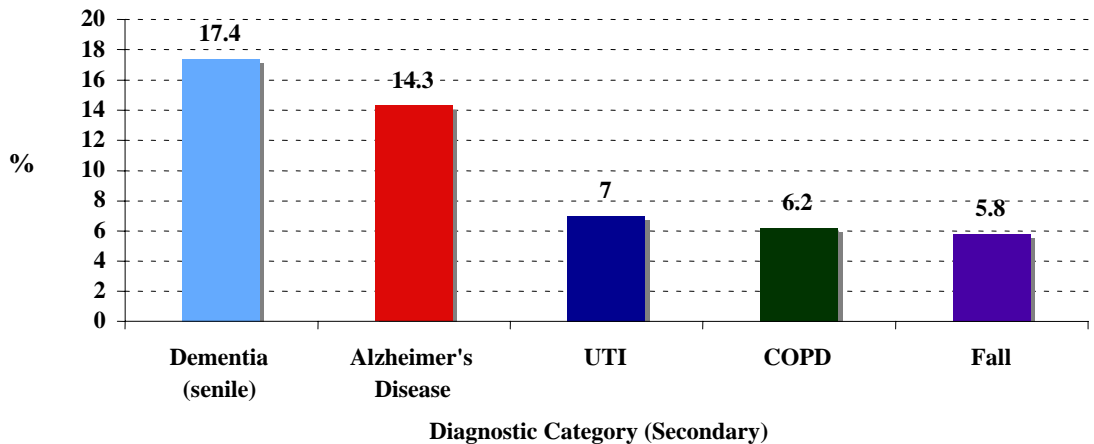

Supplement: MOESM2 [file 9535690]
